# Supplementary material
Source: PubMed Central journal article supplement (PMC10424779)
Supplement: NIHMS1842910-supplement-Supplemental_Material.pdf [file NIHMS1842910-supplement-Supplemental_Material.pdf]

## Online Supplemental Material A

### Transition Readiness Interview Guide

1. Did someone (e.g., a doctor, relative, etc) teach you how to manage your own healthcare needs? This can include information on how to fill prescriptions, how to communicate with different medical providers, and so on.” Some examples of people who may have provided this information are parents, doctors, or siblings.”
  - a. No (skip to question 4)
  - b. *If yes, say,* “Who was the main person who taught you how to manage your own healthcare needs?”
  
2. *If they already named a medical provider in question 1, skip to 2 b. If not, continue with full prompt for question 2.* “Medical providers (doctors, nurses, pharmacists, physician’s assistants, etc) often educate their patients on how to manage their healthcare needs. Did you receive information from any medical providers regarding how to manage your own healthcare needs?”
  - a. No (Skip to Question 3)
  - b. Yes (Continue with the rest of this question)
    - i. *If yes, say,* “Please list all types of medical providers that provided you this information. Be as specific as you can (e.g., your primary care provider, cardiologist, etc).”
  
    - ii. “Overall, are you satisfied with the education you received from your medical provider(s) regarding how to manage your own healthcare needs?”
      1. Yes
        - a. *If yes,* “Please describe the education you received from your medical provider(s) and what was most helpful.”
      2. No
        - a. *If no,* “Why not? What would have made it more helpful?”
    - iii. “There are many healthcare tasks medical providers may have educated you on. Please respond yes or no to indicate whether a medical provider educated you on how to complete the following tasks. You may indicate “not applicable” for any tasks that do not pertain to you.”
      1. Filling prescriptions.
        - a. Yes
        - b. No
        - c. NA
      2. Scheduling medical appointments
        - a. Yes
        - b. No
        - c. NA
      3. Remembering to attend medical appointments
        - a. Yes
        - b. No

- c. NA
  - 4. Details of your personal medical history
    - a. Yes
    - b. No
    - c. NA
  - 5. Communicating with healthcare providers
    - a. Yes
    - b. No
    - c. NA
  - 6. Managing your health insurance
    - a. Yes
    - b. No
    - c. NA
  - 7. Taking medications as prescribed
    - a. Yes
    - b. No
    - c. NA
  - 8. Names and dosages of current medications
    - a. Yes
    - b. No
    - c. NA
- iv. “Some ways people learn about managing their healthcare needs are via pamphlets, internet links, or conversations with others. I am going to list a number of ways that your medical provider(s) may have informed you about managing your own healthcare. Please answer yes or no to indicate whether a medical provider used each method to educate you about your healthcare needs.”
1. Verbal discussion?
    - a. Yes
    - b. No
  2. Pamphlets?
    - a. Yes
    - b. No
  3. Internet links?
    - a. Yes
    - b. No
  4. Group meetings with other teens and young adults?
    - a. Yes
    - b. No
  5. Please list any other ways a medical provider educated you on managing your healthcare needs.
    - a. “Which method did you prefer?”
    - b. “Which method was least helpful?”

3. “Did a parent or other caregiver provide you with information on how to manage your own healthcare?” *If the patient expresses uncertainty say, “For example, did your mother, father, grandparent, aunt or uncle provide you with this information?”*
  - a. No (Skip to Question 4)
  - b. Yes (continue with this question)
    - i. *If yes, “Please list all parents or caregivers who provided you with information on how to manage your own healthcare.”*
    - ii. “There are many healthcare tasks family members may have educated you on. Please respond yes or no to indicate whether a parent or other caregiver educated you on the following tasks. You may indicate “not applicable” for any tasks that do not pertain to you.”
      1. Filling prescriptions.
        - a. Yes
        - b. No
        - c. NA
      2. Scheduling medical appointments
        - a. Yes
        - b. No
        - c. NA
      3. Remembering to attend medical appointments
        - a. Yes
        - b. No
        - c. NA
      4. Details of your personal medical history
        - a. Yes
        - b. No
        - c. NA
      5. Details of your family medical history
        - a. Yes
        - b. No
        - c. NA
      6. Communicating with healthcare providers
        - a. Yes
        - b. No
        - c. NA
      7. Managing your health insurance
        - a. Yes
        - b. No
        - c. NA
      8. Taking medications as prescribed
        - a. Yes
        - b. No
        - c. NA
      9. Names and dosages of current medications
        - a. Yes
        - b. No

- c. NA
- iii. “Some ways people learn about managing their healthcare needs are via pamphlets, internet links, or conversations with others. I am going to list a number of ways that your parent or caregiver may have informed you about managing your own healthcare. Please answer yes or no to indicate whether a parent or caregiver used each method to educate you about your healthcare needs.”
1. Verbal discussion?
    - a. Yes
    - b. No
  2. Pamphlets?
    - a. Yes
    - b. No
  3. Internet links?
    - a. Yes
    - b. No
  4. Please list any other ways your parent or caregiver educated you on managing your healthcare needs.
    - a. “Which method did you prefer?”
    - b. “Which method was least helpful?”
4. Did you learn how to manage any aspects of your healthcare on your own, without the help of a parent, medical doctor or anyone else?
- a. No (Skip to question 5)
  - b. Yes (continue with this question)
    - i. *If yes, “What aspects of your medical care did you learn on your own?” If the participant has trouble thinking of a response say, “Did you learn how to make your own appointments, fill your prescriptions, or maybe something else, on your own?”*
    - ii. “I have a list of some aspects of your medical care you may have learned on your own. Please answer yes or no to indicate which of these tasks you learned to manage independently. If any tasks are not applicable to you, you can say that.”
      1. Filling prescriptions.
        - a. Yes
        - b. No
        - c. NA
      2. Scheduling medical appointments
        - a. Yes
        - b. No
        - c. NA
      3. Remembering to attend medical appointments
        - a. Yes
        - b. No
        - c. NA
      4. Knowing your personal medical history

- a. Yes
    - b. No
    - c. NA
  - 5. Knowing your family medical history
    - a. Yes
    - b. No
    - c. NA
  - 6. Communicating with healthcare providers
    - a. Yes
    - b. No
    - c. NA
  - 7. Being in charge of your health insurance
    - a. Yes
    - b. No
    - c. NA
  - 8. Taking medications as prescribed
    - a. Yes
    - b. No
    - c. NA
  - 9. Names and dosages of current medications
    - a. Yes
    - b. No
    - c. NA
  - iii. “For the aspects of your medical care that you learned to manage on your own, how did you gather this information? For instance, did you read books on the topic or search the internet?”
  - iv. “Did you feel like you needed more help navigating this process of learning to manage your own healthcare needs?”
    - 1. Yes
    - 2. No
5. “I have a list of several healthcare tasks that young adults may find hard, moderate, or easy. I want you to tell me whether you think each of these tasks is hard, moderate or easy for you to manage on your own. If not applicable to you, you can say that”
- a. Filling prescriptions.
    - i. Hard
    - ii. Moderate
    - iii. Easy
    - iv. NA
  - b. Scheduling medical appointments
    - i. Hard
    - ii. Moderate
    - iii. Easy
    - iv. NA
  - c. Remembering to attend medical appointments
    - i. Hard

- ii. Moderate
    - iii. Easy
    - iv. NA
  - d. Knowing your personal medical history
    - i. Hard
    - ii. Moderate
    - iii. Easy
    - iv. NA
  - e. Knowing your family medical history
    - i. Hard
    - ii. Moderate
    - iii. Easy
    - iv. NA
  - f. Communicating with healthcare providers
    - i. Hard
    - ii. Moderate
    - iii. Easy
    - iv. NA
  - g. Being in charge of your health insurance
    - i. Hard
    - ii. Moderate
    - iii. Easy
    - iv. NA
  - h. Taking medications as prescribed
    - i. Hard
    - ii. Moderate
    - iii. Easy
    - iv. NA
6. “What is/has been the most difficult part of learning to manage your own healthcare needs?”
- a. “What about [whatever they say] was difficult?”
7. “What is the easiest part of managing your own healthcare needs?”
- a. “What made [whatever they say] the easiest part?”
8. “Do you feel like you need(ed) more information about managing your own healthcare needs than you received?”
- a. No. (Terminate Interview)
  - b. Yes (continue with this question)
    - i. “In what specific areas would you like more information?”

*Note.* Though unlikely to lead to differences in responding, questions related to learning about health insurance via caregiver education versus independent learning included slight differences in wording (i.e., “managing your health insurance” versus “being in charge of your health insurance”).

## Online Supplemental Material B

### Codebook of Six Themes Related to Aspects of Managing Healthcare Needs

| <b>Code</b>                       | <b>Description</b>                                                                                                                                                                               | <b>Examples</b>                                                                                                                                                                                                                           |
|-----------------------------------|--------------------------------------------------------------------------------------------------------------------------------------------------------------------------------------------------|-------------------------------------------------------------------------------------------------------------------------------------------------------------------------------------------------------------------------------------------|
| Health Insurance                  | Healthcare management related to health insurance coverage, billing, insurance plans, terminology/health insurance literacy                                                                      | <ul style="list-style-type: none"> <li>- Finding health insurance options</li> <li>- Understanding coverage</li> <li>- Everything related to insurance, I still rely on parents</li> <li>- Knowing how insurance will bill me</li> </ul>  |
| Medication Management             | Healthcare management related to taking or acquiring prescription medications or over the counter medications                                                                                    | <ul style="list-style-type: none"> <li>- Making my own decision about what medicine to take</li> <li>- Remembering to take meds everyday</li> <li>- Taking antibiotics all the way</li> </ul>                                             |
| Scheduling/Attending Appointments | Healthcare management related to how to schedule appointments in healthcare system or remembering to attend scheduled appointments                                                               | <ul style="list-style-type: none"> <li>- Remembering to make appointments</li> <li>- Setting up doctor's appointments</li> <li>- Remembering appointments if you don't write them down</li> </ul>                                         |
| Knowledge of Self                 | Knowledge related to managing healthcare by knowing personal or family medical history, self-care, knowing when symptoms require doing to the doctor                                             | <ul style="list-style-type: none"> <li>- Knowing if it is necessary to go to doctor</li> <li>- Knowing your symptoms and if something is off</li> <li>- Knowing my family's medical history</li> </ul>                                    |
| Independence                      | Managing aspects of healthcare independently without involvement of previously involved parents or caregivers                                                                                    | <ul style="list-style-type: none"> <li>- Being an advocate for myself instead of letting someone do it for me</li> <li>- Going by yourself (to appointments) without parents</li> <li>- Taking over everything all of a sudden</li> </ul> |
| Provider Interactions             | Interacting with healthcare providers during appointments, managing communication with provider within and outside of appointments, and navigating finding a new healthcare provider when needed | <ul style="list-style-type: none"> <li>- Talking with healthcare providers about specific issues</li> <li>- Finding a provider/who to go to</li> <li>- Communicating with doctors and asking questions</li> </ul>                         |

### Online Supplemental Material C

Table 1C. *Sample healthcare characteristics*

| Descriptives/Frequencies ( <i>N</i> = 108)                                                       | <i>M</i> ( <i>SD</i> )/ <i>n</i> (%) |
|--------------------------------------------------------------------------------------------------|--------------------------------------|
| Insurance                                                                                        |                                      |
| Private health insurance or Tricare                                                              | 86 (80%)                             |
| Medicare/Medicaid                                                                                | 9 (8%)                               |
| Student health insurance                                                                         | 5 (5%)                               |
| No health insurance                                                                              | 8 (7%)                               |
| Other                                                                                            | 1 (1%)                               |
| Primary care doctor currently seen                                                               |                                      |
| Pediatrician                                                                                     | 31 (29%)                             |
| Adult primary care or family medicine doctor<br>( <i>NOT at Student Health Center</i> )          | 75 (69%)                             |
| Not reported                                                                                     | 2 (2%)                               |
| Also seen at Student Health Center for primary care issues<br>(e.g., flu, sinus infections, etc) |                                      |
| Yes                                                                                              | 80 (74%)                             |
| No                                                                                               | 28 (26%)                             |
| Age at transfer from pediatric to adult primary care                                             |                                      |
| < 18 years                                                                                       | 36 (33%)                             |
| 18 years                                                                                         | 32 (30%)                             |
| 19 years                                                                                         | 8 (7%)                               |
| 20 years                                                                                         | 5 (5%)                               |
| 21 years                                                                                         | 3 (3%)                               |
| Not reported                                                                                     | 36 (33%)                             |
| Frequency of primary care visits                                                                 |                                      |
| Every 3 months or more frequently                                                                | 6 (6%)                               |
| Every 4 – 6 months                                                                               | 17 (16%)                             |
| Every 7 – 9 months                                                                               | 8 (7%)                               |
| Every 10-12 months                                                                               | 42 (39%)                             |
| Never                                                                                            | 7 (6%)                               |
| Does not have an adult primary care doctor                                                       | 28 (26%)                             |
| Adult specialty care providers seen                                                              |                                      |
| Gynecologist                                                                                     | 10 (9%)                              |
| Dermatologist                                                                                    | 6 (6%)                               |
| Gastroenterologist                                                                               | 2 (2%)                               |
| Ophthalmologist                                                                                  | 1 (1%)                               |
| Psychiatrist                                                                                     | 1 (1%)                               |
| Neurologist                                                                                      | 1 (1%)                               |
| Otolaryngologist                                                                                 | 1 (1%)                               |
| Other, not specified                                                                             | 5 (5%)                               |
| Not seeing an adult specialist provider                                                          | 81 (75%)                             |



### Online Supplemental Materials D

Table 1D. *Semi-structured interview responses to healthcare education experiences in preparation for transition.*

|                                                                                                                        | Endorsed<br>Yes, <i>n</i> (%) | Follow-up questions                             | Summary of responses to follow-up questions                                                                                                                                                                                                                                                                                                      |
|------------------------------------------------------------------------------------------------------------------------|-------------------------------|-------------------------------------------------|--------------------------------------------------------------------------------------------------------------------------------------------------------------------------------------------------------------------------------------------------------------------------------------------------------------------------------------------------|
| <i>Did someone teach you how to manage your own healthcare needs?</i>                                                  | 88/108 (82%)                  |                                                 | -----                                                                                                                                                                                                                                                                                                                                            |
| <i>Did you receive information from any <b>medical providers</b> regarding how to manage your own healthcare needs</i> | 46/88 (52%)                   | <i>What was the education?</i>                  | Education included: <ul style="list-style-type: none"> <li>• Filling prescriptions</li> <li>• Scheduling and remembering appointments</li> <li>• Knowing medical history</li> <li>• Communicating with providers</li> <li>• Taking and knowing medication information.</li> </ul> Fewer reported medical provider education regarding insurance. |
| <i>What type(s) of providers gave this information:</i>                                                                |                               |                                                 |                                                                                                                                                                                                                                                                                                                                                  |
| <i>Primary care providers</i>                                                                                          | 32/46 (70%)                   |                                                 |                                                                                                                                                                                                                                                                                                                                                  |
| <i>Specialty care providers</i>                                                                                        | 15/46 (33%)                   |                                                 |                                                                                                                                                                                                                                                                                                                                                  |
| <i>Pediatricians</i>                                                                                                   | 11/46 (24%)                   |                                                 |                                                                                                                                                                                                                                                                                                                                                  |
| <i>Pharmacists</i>                                                                                                     | 4/46 (9%)                     |                                                 | -----                                                                                                                                                                                                                                                                                                                                            |
| <i>Campus Health Center</i>                                                                                            | 3/46 (7%)                     |                                                 |                                                                                                                                                                                                                                                                                                                                                  |
| <i>Nurses</i>                                                                                                          | 3/46 (7%)                     |                                                 |                                                                                                                                                                                                                                                                                                                                                  |
| <i>Physician assistants</i>                                                                                            | 2/46 (4%)                     |                                                 |                                                                                                                                                                                                                                                                                                                                                  |
| <i>Psychologist</i>                                                                                                    | 1/46 (2%)                     |                                                 |                                                                                                                                                                                                                                                                                                                                                  |
| <i>What method(s) did your provider use:</i>                                                                           |                               |                                                 |                                                                                                                                                                                                                                                                                                                                                  |
| <i>Verbal discussion?</i>                                                                                              | 46/46 (100%)                  | <i>What method was preferred/least helpful?</i> | The majority preferred verbal discussions. Pamphlets were reportedly least helpful for many, but some indicated pamphlets were helpful to have as a reference later on, as well as written record of verbal discussion                                                                                                                           |
| <i>Pamphlets?</i>                                                                                                      | 32/46 (70%)                   |                                                 |                                                                                                                                                                                                                                                                                                                                                  |
| <i>Internet links?</i>                                                                                                 | 13/46 (28%)                   |                                                 |                                                                                                                                                                                                                                                                                                                                                  |
| <i>Group meetings?</i>                                                                                                 | 2/46 (4%)                     |                                                 |                                                                                                                                                                                                                                                                                                                                                  |
| <i>Are you satisfied with the education you received from providers?</i>                                               | 42/46 (91%)                   | <i>What was most helpful?</i>                   | Discussions about systemic issues (e.g., scheduling, prescriptions) and managing daily life and preventative care (e.g., nutrition, exercise, healthy lifestyle)                                                                                                                                                                                 |

|                                                                                                                                        |                                                                         |                                                                      |                                                                                                                                                                                                                                                                                                                                                                                                                                                                                                                                                                                           |
|----------------------------------------------------------------------------------------------------------------------------------------|-------------------------------------------------------------------------|----------------------------------------------------------------------|-------------------------------------------------------------------------------------------------------------------------------------------------------------------------------------------------------------------------------------------------------------------------------------------------------------------------------------------------------------------------------------------------------------------------------------------------------------------------------------------------------------------------------------------------------------------------------------------|
| <p>Did a <b>parent or other caregiver</b> provide you with information on how to manage your own healthcare?</p>                       | <p>84/88 (95%)</p>                                                      | <p>What was the education?</p>                                       | <p>Education included:</p> <ul style="list-style-type: none"> <li>• Filling prescriptions</li> <li>• Scheduling and remembering appointments</li> <li>• Personal and family medical history</li> <li>• Communicating with providers</li> <li>• Taking and knowing medication information.</li> </ul> <p>Fewer reported education from caregivers regarding insurance. The majority preferred verbal discussions or learning by example from caregivers.</p> <p>Most indicated all methods of caregiver education was helpful, though some reported internet links were least helpful.</p> |
| <p>What method(s) did your parent/caregiver use:<br/> <i>Verbal discussion?</i><br/> <i>Pamphlets?</i><br/> <i>Internet links?</i></p> | <p>83/84 (99%)<br/>           9/84 (11%)<br/>           23/84 (27%)</p> | <p>What method was preferred/least helpful?</p>                      | <p>Independent learning reported for most healthcare tasks, except knowing insurance and family medical history. Independent learning reportedly occurred through internet searches and drawing on past experiences.</p>                                                                                                                                                                                                                                                                                                                                                                  |
| <p>Did you learn to manage any aspects of your healthcare <b>on your own</b>?</p>                                                      | <p>61/108 (56%)</p>                                                     | <p>What was learned/not learned independently and how?</p>           | <p>-----</p>                                                                                                                                                                                                                                                                                                                                                                                                                                                                                                                                                                              |
| <p>Did you feel you needed more help navigating this process of learning to manage your own healthcare needs?</p>                      | <p>27/61 (44%)</p>                                                      | <p>In what specific areas would you have liked more information?</p> | <p>The vast majority indicated needing more information about insurance</p>                                                                                                                                                                                                                                                                                                                                                                                                                                                                                                               |

Table 2D. *Semi-structured interview responses regarding level of difficulty managing various healthcare tasks independently*

|                                            | Students rated task as: |                 |                 |                |
|--------------------------------------------|-------------------------|-----------------|-----------------|----------------|
|                                            | Easy                    | Moderate        | Hard            | Not applicable |
| Filling prescriptions                      | <b>83 (77%)</b>         | 18 (17%)        | 3 (3%)          | 4 (4%)         |
| Scheduling medical appointments            | <b>91 (84%)</b>         | 16 (15%)        | 1 (1%)          | --             |
| Remembering to attend medical appointments | <b>92 (85%)</b>         | 14 (13%)        | 2 (2%)          | --             |
| Knowing personal medical history           | <b>79 (73%)</b>         | 25 (23%)        | 4 (4%)          | --             |
| Knowing family medical history             | 23 (21%)                | <b>61 (57%)</b> | 23 (21%)        | 1 (1%)         |
| Communicating with healthcare providers    | <b>68 (63%)</b>         | 36 (33%)        | 4 (4%)          | --             |
| Being in charge of health insurance        | 5 (5%)                  | 25 (23%)        | <b>64 (59%)</b> | 14 (13%)       |
| Taking medications as prescribed           | <b>92 (85%)</b>         | 14 (13%)        | 1 (1%)          | 1 (1%)         |

*Note.* Bolding indicates majority of college students indicated level of difficulty. Ratings of difficulty were standard item options from the semi-structured interview.

Table 3D. *Thematically coded open-ended semi-structured interview responses regarding “most difficult” and “easiest” parts of learning to manage own healthcare needs*

| Theme                                                                                                   | Number of responses coded | Summaries of student responses                                                                                                                                                          |
|---------------------------------------------------------------------------------------------------------|---------------------------|-----------------------------------------------------------------------------------------------------------------------------------------------------------------------------------------|
| <i>What is/has been the <u>most difficult</u> part of learning to manage your own healthcare needs?</i> |                           |                                                                                                                                                                                         |
| Health Insurance                                                                                        | 72                        | Dealing with health insurance options<br>Understanding health insurance coverage<br>Transferring to personal insurance from parents’ plan                                               |
| Scheduling/Attending Appointments                                                                       | 10                        | Knowing when to make appointments, keeping up with check-ups<br>Remembering to attend appointments<br>Forcing self to go to the doctor when not sick                                    |
| Knowledge of Self                                                                                       | 10                        | Knowledge of personal and family medical history<br>Knowing what to ask doctor, what information to research<br>Knowing when “sick enough” to go to the doctor                          |
| Independence                                                                                            | 10                        | Transition from parent involvement in care to independence<br>Being an advocate for self, instead of someone else doing it for her<br>Keeping track of own medical record               |
| Medication Management                                                                                   | 10                        | Remembering to take medications every day and on time<br>Taking antibiotics all the way<br>Making decisions about what medicine to take for various issues                              |
| Provider Interactions                                                                                   | 3                         | Communicating with providers about specific concerns<br>Finding a new provider, knowing who is good to go to                                                                            |
| <i>What is the <u>easiest</u> part of managing your own healthcare needs?</i>                           |                           |                                                                                                                                                                                         |
| Scheduling/Attending appointments                                                                       | 63                        | Scheduling appointments and remembering to attend<br>University health center makes it easy (online portal or phone call)<br>All you have to do is show up, go when you’re sick         |
| Medication Management                                                                                   | 35                        | Setting reminders in phone to remember to take medications<br>Automated, technology-enabled process for refills<br>Easy and quick task, becomes automatic over time                     |
| Independence                                                                                            | 10                        | Importance of self-care (e.g., physical activity, nutrition)<br>Health is no one else’s responsibility but own, “it’s on me”<br>Independently organize healthcare needs, no “middleman” |
| Provider Interactions                                                                                   | 9                         | Easy to talk about yourself<br>Assurance of privacy and confidentiality, increased comfort<br>Comfort in asking questions when don’t know answer                                        |
| Knowledge of Self                                                                                       | 6                         | Lived experience of personal medical history<br>Knowledge about own body, attuned to when something is “off”                                                                            |
| Health Insurance                                                                                        | 2                         | List of providers in network, pick provider from options                                                                                                                                |

**Online Supplemental Material E**

Table 1E. *Demographic information by racial/ethnic group*

|                                     | White students<br>(n=63) | Asian students<br>(n=19) | Black students<br>(n=13) | Hispanic students<br>(n=9) |
|-------------------------------------|--------------------------|--------------------------|--------------------------|----------------------------|
|                                     | <i>M (SD)/n (%)</i>      | <i>M (SD)/n (%)</i>      | <i>M (SD)/n (%)</i>      | <i>M (SD)/n (%)</i>        |
| Age (years)                         | 21.03 (1.07)             | 20.93 (1.33)             | 20.62 (1.22)             | 20.81 (1.24)               |
| Gender                              |                          |                          |                          |                            |
| Male                                | 12 (19%)                 | 4 (21%)                  | 5 (38%)                  | 1 (11%)                    |
| Female                              | 50 (79%)                 | 15 (79%)                 | 8 (62%)                  | 8 (89%)                    |
| Annual Family Household Income      |                          |                          |                          |                            |
| \$49,000 or less                    | 4 (6%)                   | 3 (16%)                  | 6 (46%)                  | 1 (11%)                    |
| \$50,000 - \$79,999                 | 11 (17%)                 | 3 (16%)                  | 5 (38%)                  | 3 (33%)                    |
| \$80,000 - \$99,999                 | 4 (6%)                   | 4 (37%)                  | 0 (0%)                   | 1 (11%)                    |
| \$100,000 - \$199,999               | 22 (35%)                 | 1 (5%)                   | 0 (0%)                   | 2 (22%)                    |
| \$200,000 or more                   | 14 (22%)                 | 4 (37%)                  | 0 (0%)                   | 1 (11%)                    |
| Not provided                        | 8 (13%)                  | 4 (37%)                  | 2 (15%)                  | 1 (11%)                    |
| Year in school                      |                          |                          |                          |                            |
| 2 <sup>nd</sup> year                | 26 (41%)                 | 9 (47%)                  | 7 (54%)                  | 3 (33%)                    |
| 3 <sup>rd</sup> year                | 18 (29%)                 | 7 (37%)                  | 5 (38%)                  | 4 (44%)                    |
| 4 <sup>th</sup> year                | 16 (25%)                 | 2 (11%)                  | 0 (0%)                   | 1 (11%)                    |
| 5 <sup>th</sup> year or beyond      | 3 (5%)                   | 1 (5%)                   | 1 (8%)                   | 1 (11%)                    |
| Insurance                           |                          |                          |                          |                            |
| Private health insurance or Tricare | 59 (90%)                 | 14 (74%)                 | 7 (54%)                  | 4 (44%)                    |
| Medicare/Medicaid                   | 3 (5%)                   | 2 (11%)                  | 2 (15%)                  | 2 (22%)                    |
| Student health insurance            | 0 (0%)                   | 1 (5%)                   | 1 (8%)                   | 1 (11%)                    |
| No health insurance                 | 1 (2%)                   | 2 (11%)                  | 3 (23%)                  | 2 (22%)                    |
| Other                               | 0 (0%)                   | 1 (5%)                   | 0 (0%)                   | 0 (0%)                     |
| Frequency of primary care visits    |                          |                          |                          |                            |
| Every 3 months or more frequently   | 4 (6%)                   | 1 (5%)                   | 0 (0%)                   | 1 (11%)                    |
| Every 4 – 6 months                  | 10 (16%)                 | 3 (16%)                  | 2 (15%)                  | 0 (0%)                     |
| Every 7 – 9 months                  | 5 (8%)                   | 1 (5%)                   | 0 (0%)                   | 0 (0%)                     |
| Every 10-12 months                  | 26 (41%)                 | 5 (26%)                  | 7 (54%)                  | 4 (44%)                    |
| Never                               | 4 (6%)                   | 2 (11%)                  | 0 (0%)                   | 1 (11%)                    |
| Not reported                        | 14 (22%)                 | 7 (37%)                  | 4 (31%)                  | 3 (33%)                    |

Table 2E. *Thematically coded open-ended semi-structured interview responses regarding “most difficult” and “easiest” parts of learning to manage own healthcare needs among Asian, Black, Hispanic identifying college students.*

| Theme                                                                                                   | Number of responses coded (Full Sample) | White students (n=63) | Asian students (n=19) | Black students (n=13) | Hispanic students (n=9) |
|---------------------------------------------------------------------------------------------------------|-----------------------------------------|-----------------------|-----------------------|-----------------------|-------------------------|
| <i>What is/has been the <u>most difficult</u> part of learning to manage your own healthcare needs?</i> |                                         |                       |                       |                       |                         |
| Health Insurance                                                                                        | 72                                      | 46 (73%)              | 11 (58%)              | 8 (62%)               | 6 (67%)                 |
| Scheduling/Attending Appointments                                                                       | 10                                      | 5 (8%)                | 3 (16%)               | 1 (8%)                | 1 (11%)                 |
| Knowledge of Self                                                                                       | 10                                      | 5 (8%)                | 2 (11%)               | 1 (8%)                | 1 (11%)                 |
| Independence                                                                                            | 10                                      | 7 (11%)               | 0                     | 2 (15%)               | 1 (11%)                 |
| Medication Management                                                                                   | 10                                      | 5 (8%)                | 2 (11%)               | 2 (15%)               | 1 (11%)                 |
| Provider Interactions                                                                                   | 3                                       | 0                     | 3 (16%)               | 0                     | 0                       |
| <i>What is the <u>easiest</u> part of managing your own healthcare needs?</i>                           |                                         |                       |                       |                       |                         |
| Scheduling/Attending Appointments                                                                       | 63                                      | 38 (60%)              | 10 (53%)              | 7 (54%)               | 7 (78%)                 |
| Medication Management                                                                                   | 35                                      | 25 (40%)              | 7 (39%)               | 2 (15%)               | 1 (11%)                 |
| Independence                                                                                            | 10                                      | 6 (10%)               | 1 (5%)                | 1 (8%)                | 1 (11%)                 |
| Provider Interactions                                                                                   | 9                                       | 7 (11%)               | 0                     | 2 (15%)               | 0                       |
| Knowledge of Self                                                                                       | 6                                       | 2 (3%)                | 1 (5%)                | 2 (15%)               | 1 (11%)                 |
| Health Insurance                                                                                        | 2                                       | 2 (3%)                | 0                     | 0                     | 0                       |

<sup>a</sup>n = 2 participants indicated other race/ethnicity, noted as Indian or mixed race

Table 3E. *Thematically coded open-ended semi-structured interview frequencies and summary responses regarding “most difficult” and “easiest” parts of learning to manage own healthcare needs among Asian, Black, Hispanic identifying college students.*

| Asian students                                                                                          | # responses coded | Summaries of Asian students’ responses                                                                            |
|---------------------------------------------------------------------------------------------------------|-------------------|-------------------------------------------------------------------------------------------------------------------|
| <i>What is/has been the <u>most difficult</u> part of learning to manage your own healthcare needs?</i> |                   |                                                                                                                   |
| Health Insurance                                                                                        | 11                | Unsure about rules and insurance plans, confusing terminology                                                     |
| Scheduling/Attending Appointments                                                                       | 3                 | Time to attend, remembering to schedule, finding new doctor                                                       |
| Knowledge of Self                                                                                       | 2                 | Knowing when “sick enough” to go to the doctor                                                                    |
| Independence                                                                                            | 0                 | ---                                                                                                               |
| Medication Management                                                                                   | 2                 | Remembering to take medications every day and on time                                                             |
| Provider Interactions                                                                                   | 3                 | Finding a new provider, knowing who has “best interest”<br>Unsure what to share, providers can be “condescending” |
| <i>What is the <u>easiest</u> part of managing your own healthcare needs?</i>                           |                   |                                                                                                                   |
| Scheduling/Attending Appointments                                                                       | 10                | Scheduling appointments and attending once scheduled                                                              |
| Medication Management                                                                                   | 7                 | Taking medications as self-care, on time and as prescribed                                                        |
| Independence                                                                                            | 1                 | Independence in communicating to get necessary information                                                        |
| Provider Interactions                                                                                   | 0                 | ---                                                                                                               |
| Knowledge of Self                                                                                       | 1                 | Knowing personal medical history and body                                                                         |
| Health Insurance                                                                                        | 0                 | ---                                                                                                               |
| Black students                                                                                          | # responses coded | Summaries of Black students’ responses                                                                            |
| <i>What is/has been the <u>most difficult</u> part of learning to manage your own healthcare needs?</i> |                   |                                                                                                                   |
| Health Insurance                                                                                        | 8                 | Unsure about coverage on plans, confusing terminology                                                             |
| Scheduling/Attending Appointments                                                                       | 1                 | Time to attend, remembering to schedule, finding new doctor                                                       |
| Knowledge of Self                                                                                       | 1                 | Knowing when to go to doctor                                                                                      |
| Independence                                                                                            | 2                 | Maintaining medical record across providers, going by themselves to the doctor                                    |
| Medication Management                                                                                   | 2                 | Taking full dose of medications (e.g., antibiotics) and on time                                                   |
| Provider Interactions                                                                                   | 0                 | ---                                                                                                               |
| <i>What is the <u>easiest</u> part of managing your own healthcare needs?</i>                           |                   |                                                                                                                   |
| Scheduling/Attending Appointments                                                                       | 7                 | Scheduling appointments and attending once scheduled                                                              |
| Medication Management                                                                                   | 2                 | Filling prescriptions                                                                                             |
| Independence                                                                                            | 1                 | Learned independence by observing parents as role models                                                          |
| Provider Interactions                                                                                   | 2                 | Communicating with doctors, verbally expressing self                                                              |
| Knowledge of Self                                                                                       | 2                 | Knowing body and symptoms when something is “off”                                                                 |
| Health Insurance                                                                                        | 0                 | ---                                                                                                               |
| Hispanic students                                                                                       | # responses coded | Summaries of Hispanic students’ responses                                                                         |
| <i>What is/has been the <u>most difficult</u> part of learning to manage your own healthcare needs?</i> |                   |                                                                                                                   |
| Health Insurance                                                                                        | 6                 | Understanding coverage of plans, managing insurance                                                               |
| Scheduling/Attending Appointments                                                                       | 1                 | Keeping track of appointments                                                                                     |

---

|                                                                               |   |                                                  |
|-------------------------------------------------------------------------------|---|--------------------------------------------------|
| Knowledge of Self                                                             | 1 | Knowing family and medical history               |
| Independence                                                                  | 1 | Doing all healthcare tasks “on own”              |
| Medication Management                                                         | 1 | Taking medicine                                  |
| Provider Interactions                                                         | 0 | ---                                              |
| <i>What is the <u>easiest</u> part of managing your own healthcare needs?</i> |   |                                                  |
| Scheduling/Attending<br>Appointments                                          | 7 | Scheduling and attending appointments            |
| Medication Management                                                         | 1 | Refilling previously established prescriptions   |
| Independence                                                                  | 1 | Available resources to help promote independence |
| Provider Interactions                                                         | 0 | ---                                              |
| Knowledge of Self                                                             | 1 | Knowing personal medical history                 |
| Health Insurance                                                              | 0 | ---                                              |

---



**Online Supplemental Material F**

Table 1F. *Demographic information by gender*

|                                  |                                     | Female students<br>(n=85) | Male students<br>(n=22) |
|----------------------------------|-------------------------------------|---------------------------|-------------------------|
|                                  |                                     | <i>M (SD)/n (%)</i>       | <i>M (SD)/n (%)</i>     |
| Age (years)                      |                                     | 20.93 (1.09)              | 20.85 (1.25)            |
| Race/ethnicity                   |                                     |                           |                         |
|                                  | White                               | 50 (59%)                  | 12 (55%)                |
|                                  | Black                               | 8 (10%)                   | 5 (23%)                 |
|                                  | Asian                               | 15 (18%)                  | 4 (18%)                 |
|                                  | Hispanic                            | 8 (10%)                   | 1 (5%)                  |
|                                  | Other                               | 2 (2%)                    | 0                       |
| Annual family household income   |                                     |                           |                         |
|                                  | \$49,000 or less                    | 10 (12%)                  | 5 (23%)                 |
|                                  | \$50,000 - \$79,999                 | 16 (19%)                  | 6 (27%)                 |
|                                  | \$80,000 - \$99,999                 | 9 (11%)                   | 0                       |
|                                  | \$100,000 - \$199,999               | 24 (28%)                  | 2 (9%)                  |
|                                  | \$200,000 or more                   | 13 (15%)                  | 6 (27%)                 |
|                                  | Not provided                        | 13 (15%)                  | 3 (14%)                 |
| Year in school                   |                                     |                           |                         |
|                                  | 2 <sup>nd</sup> year                | 36 (42%)                  | 11 (50%)                |
|                                  | 3 <sup>rd</sup> year                | 26 (31%)                  | 9 (41%)                 |
|                                  | 4 <sup>th</sup> year                | 19 (22%)                  | 0                       |
|                                  | 5 <sup>th</sup> year or beyond      | 4 (5%)                    | 2 (9%)                  |
| Insurance                        |                                     |                           |                         |
|                                  | Private health insurance or Tricare | 70 (82%)                  | 15 (73%)                |
|                                  | Medicare/Medicaid                   | 7 (8%)                    | 2 (9%)                  |
|                                  | Student health insurance            | 3 (4%)                    | 2 (9%)                  |
|                                  | No health insurance                 | 5 (6%)                    | 3 (14%)                 |
|                                  | Other                               | 1 (1%)                    | 0                       |
| Frequency of primary care visits |                                     |                           |                         |
|                                  | Every 3 months or more frequently   | 6 (7%)                    | 0                       |
|                                  | Every 4 – 6 months                  | 10 (12%)                  | 6 (27%)                 |
|                                  | Every 7 – 9 months                  | 5 (6%)                    | 3 (14%)                 |
|                                  | Every 10-12 months                  | 35 (41%)                  | 7 (32%)                 |
|                                  | Never                               | 6 (7%)                    | 1 (5%)                  |
|                                  | Not reported                        | 23 (27%)                  | 5 (23%)                 |

*Note.* One participant did not provide gender and their responses are excluded from table.

Table 2F. *Thematically coded open-ended semi-structured interview responses regarding “most difficult” and “easiest” parts of learning to manage own healthcare needs among female and male identifying college students.*

| Theme                                                                                                   | Number of responses coded (Full Sample) | Female students (n=85) | Male students (n=22) |
|---------------------------------------------------------------------------------------------------------|-----------------------------------------|------------------------|----------------------|
| <i>What is/has been the <u>most difficult</u> part of learning to manage your own healthcare needs?</i> |                                         |                        |                      |
| Health Insurance                                                                                        | 72                                      | 55 (65%)               | 17 (77%)             |
| Scheduling/Attending Appointments                                                                       | 10                                      | 6 (7%)                 | 4 (18%)              |
| Knowledge of Self                                                                                       | 10                                      | 8 (9%)                 | 1 (5%)               |
| Independence                                                                                            | 10                                      | 9 (11%)                | 1 (5%)               |
| Medication Management                                                                                   | 10                                      | 9 (11%)                | 1 (5%)               |
| Provider Interactions                                                                                   | 3                                       | 3 (4%)                 | 0                    |
| <i>What is the <u>easiest</u> part of managing your own healthcare needs?</i>                           |                                         |                        |                      |
| Scheduling/Attending Appointments                                                                       | 63                                      | 54 (64%)               | 9 (41%)              |
| Medication Management                                                                                   | 35                                      | 27 (32%)               | 7 (32%)              |
| Independence                                                                                            | 10                                      | 6 (7%)                 | 4 (18%)              |
| Provider Interactions                                                                                   | 9                                       | 4 (5%)                 | 5 (23%)              |
| Knowledge of Self                                                                                       | 6                                       | 5 (6%)                 | 1 (5%)               |
| Health Insurance                                                                                        | 2                                       | 2 (2%)                 | 0                    |

*Note.* One participant did not provide gender and their responses are excluded from table.

Table 3F. *Thematically coded open-ended semi-structured interview frequencies and summary responses regarding “most difficult” and “easiest” parts of learning to manage own healthcare needs among female and male identifying college students.*

| Female students                                                                                         | # responses coded | Summaries of female students’ responses                       |
|---------------------------------------------------------------------------------------------------------|-------------------|---------------------------------------------------------------|
| <i>What is/has been the <u>most difficult</u> part of learning to manage your own healthcare needs?</i> |                   |                                                               |
| Health Insurance                                                                                        | 55                | Unsure about rules and insurance plans, unknown coverage      |
| Scheduling/Attending Appointments                                                                       | 6                 | Remembering to schedule, finding new doctor                   |
| Knowledge of Self                                                                                       | 8                 | Knowing personal/family medical history, when to go to doctor |
| Independence                                                                                            | 9                 | Going independently to appointments                           |
| Medication Management                                                                                   | 9                 | Remembering medications, knowing medications to take          |
| Provider Interactions                                                                                   | 3                 | Communicating history and specific needs                      |
| <i>What is the <u>easiest</u> part of managing your own healthcare needs?</i>                           |                   |                                                               |
| Scheduling/Attending Appointments                                                                       | 54                | Scheduling appointments and attending once scheduled          |
| Medication Management                                                                                   | 27                | Filling prescriptions, taking on time and as prescribed       |
| Independence                                                                                            | 6                 | Independence in communicating to get necessary information    |
| Provider Interactions                                                                                   | 4                 | Communicating needs, comfortable asking questions             |
| Knowledge of Self                                                                                       | 5                 | Knowing personal medical history and body                     |
| Health Insurance                                                                                        | 2                 | List of providers in network, pick provider from options      |
| Male students                                                                                           | # responses coded | Summaries of male students’ responses                         |
| <i>What is/has been the <u>most difficult</u> part of learning to manage your own healthcare needs?</i> |                   |                                                               |
| Health Insurance                                                                                        | 17                | Dealing with insurance, confusing terminology                 |
| Scheduling/Attending Appointments                                                                       | 4                 | Remembering to schedule, attending appointments               |
| Knowledge of Self                                                                                       | 1                 | Knowing when to go to doctor                                  |
| Independence                                                                                            | 1                 | Keeping track of medical records                              |
| Medication Management                                                                                   | 1                 | Remembering to take medications everyday                      |
| Provider Interactions                                                                                   | 0                 | ---                                                           |
| <i>What is the <u>easiest</u> part of managing your own healthcare needs?</i>                           |                   |                                                               |
| Scheduling/Attending Appointments                                                                       | 9                 | Scheduling appointments and attending once scheduled          |
| Medication Management                                                                                   | 7                 | Filling prescriptions, remembering to take medications        |
| Independence                                                                                            | 4                 | Learned independence by observing parents as role models      |
| Provider Interactions                                                                                   | 5                 | Communicating with doctors, getting information needed        |
| Knowledge of Self                                                                                       | 1                 | Knowing how to take care of self                              |
| Health Insurance                                                                                        | 0                 | ---                                                           |

*Note.* One participant did not provide gender and their responses are excluded from table.
